# Supplementary material for: Formation of mineral-associated organic matter via rock weathering: an experimental test for the organo-metallic glue hypothesis
Source: Copernicus journal article supplement (doi:10.5194/egusphere-2025-2840), 2025-07-10
Supplement: Supplementary file 1 [file egusphere-2025-2840-supplement.pdf]

Supplement

**Table S1** Major elements in the crushed minerals of granite and basalt and the leaf compost material used to make mineral-OM mixtures.

|                  | Si                        | Ti                        | Al                        | Fe                        | Mn                         | Mg                        | Ca                        | Na                        | K                         | P                         |
|------------------|---------------------------|---------------------------|---------------------------|---------------------------|----------------------------|---------------------------|---------------------------|---------------------------|---------------------------|---------------------------|
|                  | (g kg <sup>-1</sup> bulk) | (mg kg <sup>-1</sup> bulk) | (g kg <sup>-1</sup> bulk) |
| Granite 38–75 μm | 310                       | 0.67                      | 69                        | 14                        | 400                        | N.D.                      | 8.4                       | 33                        | 34                        | N.D.                      |
| Basalt 38–75 μm  | 255                       | 4.8                       | 83                        | 78                        | 1320                       | 42                        | 64                        | 18                        | 4.6                       | 0.71                      |
| Basalt 20–38 μm  | 251                       | 7.2                       | 85                        | 87                        | 1720                       | 38                        | 66                        | 18                        | 4.0                       | 0.60                      |
| Leaf compost     | 56                        | 0.41                      | 8.6                       | 6.9                       | 500                        | 3.1                       | 33                        | N.D.                      | 3.7                       | 1.1                       |

Total elemental compositions were determined by XRF analysis (NEX CG, Rigaku Corporation, Tokyo, Japan).

*n* = 1

N.D. Not detected.

**Table S2** Specific surface area and extractable Al, Fe, and Si in the initial granite, basalt, sand, and leaf compost materials used to prepare the mineral-OM mixtures.

|                  | Specific surface area<br>(m <sup>2</sup> g <sup>-1</sup> ) |
|------------------|------------------------------------------------------------|
| Granite 38–75 µm | 0.73                                                       |
| Basalt 38–75 µm  | 2.9                                                        |
| Basalt 20–38 µm  | 3.5                                                        |
| Sand 100–300 µm  | 0.76                                                       |
| Leaf compost     | N.A.                                                       |

|                  | Sodium pyrophosphate (PP)   |                             |                             | Acid oxalate (OX)           |                             |                             | Dithionite-citrate (DC)     |                             |                             |
|------------------|-----------------------------|-----------------------------|-----------------------------|-----------------------------|-----------------------------|-----------------------------|-----------------------------|-----------------------------|-----------------------------|
|                  | Al<br>(mg g <sup>-1</sup> ) | Fe<br>(mg g <sup>-1</sup> ) | Si<br>(mg g <sup>-1</sup> ) | Al<br>(mg g <sup>-1</sup> ) | Fe<br>(mg g <sup>-1</sup> ) | Si<br>(mg g <sup>-1</sup> ) | Al<br>(mg g <sup>-1</sup> ) | Fe<br>(mg g <sup>-1</sup> ) | Si<br>(mg g <sup>-1</sup> ) |
| Granite 38–75 µm | N.D.                        | N.D.                        | N.D.                        | 0.29 ± 0.01                 | 0.77 ± 0.02                 | 0.21 ± 0.01                 | 0.35 ± 0.13                 | 3.3 ± 1.1                   | 1.7 ± 0.6                   |
| Basalt 38–75 µm  | 0.17 ± 0.01                 | 0.35 ± 0.03                 | 0.59 ± 0.06                 | 5.6 ± 0.1                   | 32 ± 1                      | 3.4 ± 0.0                   | 0.82 ± 0.05                 | 5.8 ± 0.8                   | 10 ± 1                      |
| Basalt 20–38 µm  | 0.22 ± 0.04                 | 0.47 ± 0.07                 | 0.76 ± 0.15                 | 6.8 ± 0.8                   | 40 ± 1                      | 4.8 ± 0.7                   | 0.77 ± 0.25                 | 5.3 ± 1.6                   | 7.8 ± 2.4                   |
| Sand 100–300 µm  | N.D.                        | N.D.                        | N.D.                        | 0.027 ± 0.015               | 0.091 ± 0.027               | N.D.                        | 0.32 ± 0.24                 | 2.9 ± 1.9                   | 1.2 ± 1.1                   |
| Leaf compost     | 0.075 ± 0.009               | 0.10 ± 0.00                 | 4.4 ± 0.1                   | 1.5 ± 0.0                   | 1.5 ± 0.0                   | 0.91 ± 0.05                 | 0.38 ± 0.02                 | 1.0 ± 0.0                   | 2.2 ± 0.1                   |

Al, Fe, and Si were extracted sequentially with sodium pyrophosphate, acid oxalate, and dithionite-citrate.

Value shows mean ± standard deviation ( $n = 3$  for granite, basalts, and sand;  $n = 2$  for leaf compost).

N.A. Not analyzed.

N.D. Not detected.

**Table S3** Gravimetric water content in the mineral-OM mixtures at the start and end of wet-and-dry cycles during the 55-day incubation.

|                             | Wet condition<br>(%) | Dry condition<br>(%) |
|-----------------------------|----------------------|----------------------|
| Granite 38–75 $\mu\text{m}$ | 62 $\pm$ 1           | $\sim$ 0             |
| Basalt 38–75 $\mu\text{m}$  | 62 $\pm$ 1           | $\sim$ 0             |
| Basalt 20–38 $\mu\text{m}$  | 63 $\pm$ 1           | $\sim$ 0             |
| Sand 100–300 $\mu\text{m}$  | 52 $\pm$ 4           | $\sim$ 0             |

The average water content of eight wet-and-dry cycles, expressed on an air-dried basis.

Value shows mean  $\pm$  standard deviation ( $n = 3$ ).

**Table S4** The amounts of C and N, and C:N ratio in each density fraction after the incubation (Day 55).

|                             | Low-density fraction<br>( $< 1.8 \text{ g cm}^{-3}$ ) |                                 |            | Meso-density fraction<br>( $1.8\text{--}2.4 \text{ g cm}^{-3}$ ) |                                 |            | High-density fraction<br>( $> 2.4 \text{ g cm}^{-3}$ ) |                                 |               |
|-----------------------------|-------------------------------------------------------|---------------------------------|------------|------------------------------------------------------------------|---------------------------------|------------|--------------------------------------------------------|---------------------------------|---------------|
|                             | C<br>( $\text{mg g}^{-1}$ bulk)                       | N<br>( $\text{mg g}^{-1}$ bulk) | C:N ratio  | C<br>( $\text{mg g}^{-1}$ bulk)                                  | N<br>( $\text{mg g}^{-1}$ bulk) | C:N ratio  | C<br>( $\text{mg g}^{-1}$ bulk)                        | N<br>( $\text{mg g}^{-1}$ bulk) | C:N ratio     |
| Granite 38–75 $\mu\text{m}$ | 39 $\pm$ 1                                            | 0.99 $\pm$ 0.03                 | 40 $\pm$ 0 | 0.55 $\pm$ 0.03                                                  | 0.028 $\pm$ 0.002               | 20 $\pm$ 1 | 0.46 $\pm$ 0.02                                        | 0.12 $\pm$ 0.05                 | 5.1 $\pm$ 1.6 |
| Basalt 38–75 $\mu\text{m}$  | 41 $\pm$ 0                                            | 1.0 $\pm$ 0.0                   | 40 $\pm$ 1 | 0.93 $\pm$ 0.04                                                  | 0.056 $\pm$ 0.005               | 17 $\pm$ 1 | 0.72 $\pm$ 0.02                                        | 0.10 $\pm$ 0.01                 | 7.1 $\pm$ 0.9 |
| Basalt 20–38 $\mu\text{m}$  | 43 $\pm$ 0                                            | 1.1 $\pm$ 0.0                   | 40 $\pm$ 0 | 1.3 $\pm$ 0.0                                                    | 0.090 $\pm$ 0.013               | 15 $\pm$ 2 | 0.76 $\pm$ 0.01                                        | 0.11 $\pm$ 0.01                 | 6.9 $\pm$ 0.9 |
| Sand 100–300 $\mu\text{m}$  | 37 $\pm$ 0                                            | 0.92 $\pm$ 0.03                 | 40 $\pm$ 1 | 0.10 $\pm$ 0.01                                                  | 0.0063 $\pm$ 0.0012             | 17 $\pm$ 2 | 0.25 $\pm$ 0.02                                        | 0.10 $\pm$ 0.04                 | 3.6 $\pm$ 1.2 |

Value shows mean  $\pm$  standard deviation ( $n = 3$ ).

**Table S5-1** Concentrations (per fraction) of extractable Al, Fe, and Si in each density fraction of the mineral-OM mixtures on Day 0.

|                                                           | Sodium pyrophosphate (PP)           |                                     |                                     | Acid oxalate (OX)                   |                                     |                                     | Dithionite-citrate (DC)             |                                     |                                     |
|-----------------------------------------------------------|-------------------------------------|-------------------------------------|-------------------------------------|-------------------------------------|-------------------------------------|-------------------------------------|-------------------------------------|-------------------------------------|-------------------------------------|
|                                                           | Al<br>(mg g <sup>-1</sup> fraction) | Fe<br>(mg g <sup>-1</sup> fraction) | Si<br>(mg g <sup>-1</sup> fraction) | Al<br>(mg g <sup>-1</sup> fraction) | Fe<br>(mg g <sup>-1</sup> fraction) | Si<br>(mg g <sup>-1</sup> fraction) | Al<br>(mg g <sup>-1</sup> fraction) | Fe<br>(mg g <sup>-1</sup> fraction) | Si<br>(mg g <sup>-1</sup> fraction) |
| Low and meso-density fraction (< 2.4 g cm <sup>-3</sup> ) |                                     |                                     |                                     |                                     |                                     |                                     |                                     |                                     |                                     |
| Basalt 38–75 µm                                           | 0.26 ± 0.01                         | 0.76 ± 0.03                         | 1.5 ± 0.0                           | 11 ± 0                              | 39 ± 1                              | 5.7 ± 0.2                           | 2.1 ± 0.1                           | 13 ± 0                              | 10 ± 0                              |
| Basalt 20–38 µm                                           | 0.28 ± 0.01                         | 0.90 ± 0.04                         | 1.6 ± 0.0                           | 14 ± 0                              | 53 ± 1                              | 7.4 ± 0.0                           | 2.2 ± 0.0                           | 13 ± 0                              | 9.2 ± 0.0                           |
| High-density fraction (> 2.4 g cm <sup>-3</sup> )         |                                     |                                     |                                     |                                     |                                     |                                     |                                     |                                     |                                     |
| Basalt 38–75 µm                                           | 0.20 ± 0.00                         | 0.35 ± 0.02                         | 0.71 ± 0.05                         | 5.4 ± 0.2                           | 30 ± 1                              | 3.7 ± 0.1                           | 0.42 ± 0.05                         | 3.5 ± 0.2                           | 10 ± 1                              |
| Basalt 20–38 µm                                           | 0.19 ± 0.01                         | 0.40 ± 0.00                         | 0.92 ± 0.33                         | 4.5 ± 0.1                           | 31 ± 1                              | 3.2 ± 0.1                           | 0.41 ± 0.05                         | 4.7 ± 0.3                           | 10 ± 0                              |

Value shows mean ± standard deviation ( $n = 3$ ).

**Table S5-2** Distribution of extractable Al, Fe, and Si in each density fraction of the mineral-OM mixtures on Day 0.

|                                                           | Sodium pyrophosphate (PP)       |                                 |                                 | Acid oxalate (OX)               |                                 |                                 | Dithionite-citrate (DC)         |                                 |                                 |
|-----------------------------------------------------------|---------------------------------|---------------------------------|---------------------------------|---------------------------------|---------------------------------|---------------------------------|---------------------------------|---------------------------------|---------------------------------|
|                                                           | Al<br>(mg g <sup>-1</sup> bulk) | Fe<br>(mg g <sup>-1</sup> bulk) | Si<br>(mg g <sup>-1</sup> bulk) | Al<br>(mg g <sup>-1</sup> bulk) | Fe<br>(mg g <sup>-1</sup> bulk) | Si<br>(mg g <sup>-1</sup> bulk) | Al<br>(mg g <sup>-1</sup> bulk) | Fe<br>(mg g <sup>-1</sup> bulk) | Si<br>(mg g <sup>-1</sup> bulk) |
| Low and meso-density fraction (< 2.4 g cm <sup>-3</sup> ) |                                 |                                 |                                 |                                 |                                 |                                 |                                 |                                 |                                 |
| Basalt 38–75 µm                                           | 0.025 ± 0.000                   | 0.062 ± 0.003                   | 0.56 ± 0.00                     | 0.88 ± 0.03                     | 2.8 ± 0.1                       | 0.48 ± 0.01                     | 0.18 ± 0.01                     | 1.0 ± 0.0                       | 0.91 ± 0.02                     |
| Basalt 20–38 µm                                           | 0.025 ± 0.001                   | 0.067 ± 0.003                   | 0.55 ± 0.00                     | 1.1 ± 0.0                       | 3.5 ± 0.1                       | 0.56 ± 0.01                     | 0.18 ± 0.00                     | 0.93 ± 0.01                     | 0.80 ± 0.01                     |
| High-density fraction (> 2.4 g cm <sup>-3</sup> )         |                                 |                                 |                                 |                                 |                                 |                                 |                                 |                                 |                                 |
| Basalt 38–75 µm                                           | 0.20 ± 0.00                     | 0.35 ± 0.02                     | 0.71 ± 0.05                     | 5.4 ± 0.2                       | 30 ± 1                          | 3.7 ± 0.1                       | 0.42 ± 0.05                     | 3.5 ± 0.2                       | 10 ± 1                          |
| Basalt 20–38 µm                                           | 0.19 ± 0.01                     | 0.40 ± 0.00                     | 0.92 ± 0.33                     | 4.5 ± 0.1                       | 31 ± 1                          | 3.2 ± 0.1                       | 0.41 ± 0.05                     | 4.7 ± 0.3                       | 10 ± 0                          |

Al, Fe, and Si were extracted sequentially with sodium pyrophosphate, acid oxalate, and dithionite-citrate.

Value shows mean ± standard deviation ( $n = 3$ ).

**Table S6** Distribution of extractable Al, Fe, and Si in each density fraction of the mineral-OM mixtures on Day 55.

|                                                     | Sodium pyrophosphate (PP)       |                                 |                                 | Acid oxalate (OX)               |                                 |                                 | Dithionite-citrate (DC)         |                                 |                                 |
|-----------------------------------------------------|---------------------------------|---------------------------------|---------------------------------|---------------------------------|---------------------------------|---------------------------------|---------------------------------|---------------------------------|---------------------------------|
|                                                     | Al<br>(mg g <sup>-1</sup> bulk) | Fe<br>(mg g <sup>-1</sup> bulk) | Si<br>(mg g <sup>-1</sup> bulk) | Al<br>(mg g <sup>-1</sup> bulk) | Fe<br>(mg g <sup>-1</sup> bulk) | Si<br>(mg g <sup>-1</sup> bulk) | Al<br>(mg g <sup>-1</sup> bulk) | Fe<br>(mg g <sup>-1</sup> bulk) | Si<br>(mg g <sup>-1</sup> bulk) |
| Low-density fraction (< 1.8 g cm <sup>-3</sup> )    |                                 |                                 |                                 |                                 |                                 |                                 |                                 |                                 |                                 |
| Granite 38–75 µm                                    | 0.030 ± 0.003                   | 0.023 ± 0.001                   | 0.28 ± 0.00                     | 0.094 ± 0.005                   | 0.15 ± 0.01                     | 0.047 ± 0.002                   | 0.027 ± 0.003                   | 0.14 ± 0.01                     | 0.25 ± 0.02                     |
| Basalt 38–75 µm                                     | 0.047 ± 0.001                   | 0.051 ± 0.002                   | 0.19 ± 0.01                     | 0.13 ± 0.01                     | 0.32 ± 0.01                     | 0.065 ± 0.002                   | 0.036 ± 0.001                   | 0.20 ± 0.00                     | 0.39 ± 0.01                     |
| Basalt 20–38 µm                                     | 0.059 ± 0.002                   | 0.080 ± 0.001                   | 0.18 ± 0.00                     | 0.23 ± 0.01                     | 0.71 ± 0.02                     | 0.13 ± 0.00                     | 0.054 ± 0.001                   | 0.37 ± 0.01                     | 0.73 ± 0.01                     |
| Sand 100–300 µm                                     | 0.033 ± 0.001                   | 0.021 ± 0.001                   | 0.26 ± 0.01                     | 0.092 ± 0.005                   | 0.14 ± 0.00                     | 0.043 ± 0.001                   | 0.022 ± 0.003                   | 0.10 ± 0.01                     | 0.21 ± 0.02                     |
| Meso-density fraction (1.8–2.4 g cm <sup>-3</sup> ) |                                 |                                 |                                 |                                 |                                 |                                 |                                 |                                 |                                 |
| Granite 38–75 µm                                    | N.A.                            |
| Basalt 38–75 µm                                     | 0.031 ± 0.001                   | 0.054 ± 0.002                   | 0.12 ± 0.01                     | 0.98 ± 0.26                     | 3.7 ± 1.0                       | 0.45 ± 0.12                     | 0.19 ± 0.02                     | 1.1 ± 0.1                       | 0.68 ± 0.05                     |
| Basalt 20–38 µm                                     | 0.057 ± 0.001                   | 0.089 ± 0.005                   | 0.22 ± 0.01                     | 2.4 ± 0.1                       | 9.5 ± 0.3                       | 1.2 ± 0.0                       | 0.31 ± 0.00                     | 1.8 ± 0.0                       | 1.2 ± 0.0                       |
| Sand 100–300 µm                                     | N.A.                            |
| High-density fraction (> 2.4 g cm <sup>-3</sup> )   |                                 |                                 |                                 |                                 |                                 |                                 |                                 |                                 |                                 |
| Granite 38–75 µm                                    | 0.0 ± 0.0                       | 0.0093 ± 0.0050                 | 0.0 ± 0.0                       | 0.11 ± 0.02                     | 0.62 ± 0.03                     | 0.12 ± 0.02                     | 0.16 ± 0.01                     | 1.7 ± 0.0                       | 0.65 ± 0.02                     |
| Basalt 38–75 µm                                     | 0.059 ± 0.009                   | 0.19 ± 0.01                     | 0.30 ± 0.02                     | 3.1 ± 0.1                       | 21 ± 1                          | 1.9 ± 0.1                       | 0.59 ± 0.03                     | 4.0 ± 0.2                       | 7.3 ± 0.2                       |
| Basalt 20–38 µm                                     | 0.11 ± 0.00                     | 0.21 ± 0.00                     | 0.43 ± 0.01                     | 3.5 ± 0.1                       | 25 ± 0                          | 2.4 ± 0.0                       | 0.45 ± 0.04                     | 3.7 ± 0.5                       | 6.9 ± 0.1                       |
| Sand 100–300 µm                                     | 0.0 ± 0.0                       | 0.0 ± 0.0                       | 0.0 ± 0.0                       | 0.014 ± 0.008                   | 0.13 ± 0.09                     | 0.0 ± 0.0                       | 0.080 ± 0.013                   | 1.2 ± 0.2                       | 0.073 ± 0.019                   |

Al, Fe, and Si were extracted sequentially with sodium pyrophosphate, acid oxalate, and dithionite-citrate.

Value shows mean ± standard deviation ( $n = 3$ ).

N.A. Not analyzed due to limited mass recovery of MF.

**Table S7** Molar ratios of total C to sequentially extracted metals in MF for the two basalt treatments after the 55-day incubation.

| Extraction reagent |              | Meso-density fraction (1.8–2.4 g cm <sup>-3</sup> ) |             |
|--------------------|--------------|-----------------------------------------------------|-------------|
|                    |              | C:Al                                                | C:Fe        |
| Basalt 38–75 µm    | PP + OX      | 2.3 ± 0.9                                           | 1.3 ± 0.5   |
|                    | PP + OX + DC | 1.9 ± 0.7                                           | 1.0 ± 0.3   |
| Basalt 20–38 µm    | PP + OX      | 1.2 ± 0.0                                           | 0.64 ± 0.02 |
|                    | PP + OX + DC | 1.1 ± 0.0                                           | 0.54 ± 0.01 |

Al and Fe were extracted sequentially with sodium pyrophosphate (PP), acid oxalate (OX), and dithionite-citrate (DC).

Value shows mean ± standard deviation ( $n = 3$ ).

**Table S8** Cell number and alpha diversity index of the bacterial community in the meso-density fraction (1.8–2.4 g cm<sup>-3</sup>;  $n = 1$ ) for granite, coarse basalt, and fine basalt treatments and bulk for all four treatments ( $n = 3$ ) on Day 55 compared to bulk in the initial leaf compost ( $n = 3$ ).

|                  |                       |        | 16S rRNA copy number<br>(copies g <sup>-1</sup> dry soil) | Chao1      | Shannon   | InvSimpson |
|------------------|-----------------------|--------|-----------------------------------------------------------|------------|-----------|------------|
| Granite 38–75 µm | Meso-density fraction | Day 55 | 1.51E+09                                                  | 1833       | 5.3       | 23         |
|                  | Bulk                  | Day 55 | 4.25E+08 ± 7.89E+07                                       | 1923 ± 179 | 6.0 ± 0.1 | 154 ± 17   |
| Basalt 38–75 µm  | Meso-density fraction | Day 55 | 3.85E+08                                                  | 1873       | 5.7       | 56         |
|                  | Bulk                  | Day 55 | 3.70E+08 ± 1.04E+08                                       | 1906 ± 79  | 5.8 ± 0.2 | 91 ± 39    |
| Basalt 20–38 µm  | Meso-density fraction | Day 55 | 5.47E+08                                                  | 1574       | 5.6       | 77         |
|                  | Bulk                  | Day 55 | 3.84E+08 ± 3.97E+07                                       | 1750 ± 76  | 5.7 ± 0.1 | 103 ± 23   |
| Sand 100–300 µm  | Bulk                  | Day 55 | 6.20E+08 ± 1.21E+08                                       | 1788 ± 115 | 5.7 ± 0.2 | 122 ± 27   |
| Leaf compost     | Bulk                  | Day 0  | 9.49E+08 ± 2.39E+08                                       | 1849 ± 52  | 6.1 ± 0.0 | 170 ± 10   |

Value shows mean ± standard deviation ( $n = 3$  for bulk samples).



**Table S9** Mantel test showing correlations between the bacterial composition and the mineral properties in the meso-density fraction for granite, coarse basalt, and fine basalt treatments on Day 55 (1.8–2.4 g cm<sup>-3</sup>;  $n = 1$ ), the bulk for all four treatments on Day 55 ( $n = 3$ ), and the bulk for the initial leaf compost (using the average of  $n = 2$ ).

| Factor                    | $R^2$       | $P$ value |
|---------------------------|-------------|-----------|
| <b>TC</b>                 | <b>0.86</b> | 0.001     |
| <b>TN</b>                 | <b>0.86</b> | 0.002     |
| <b>pH(KCl)</b>            | <b>0.82</b> | 0.001     |
| <b>pH(H<sub>2</sub>O)</b> | <b>0.80</b> | 0.001     |
| <b>Fe<sub>pp</sub></b>    | <b>0.30</b> | 0.013     |
| <b>Al<sub>pp</sub></b>    | <b>0.22</b> | 0.04      |
| Fe <sub>ox</sub>          | 0.22        | 0.068     |
| Al <sub>ox</sub>          | 0.14        | 0.286     |

Significant mantel coefficient is shown in bold.

Al and Fe were extracted sequentially with sodium pyrophosphate (PP), acid oxalate (OX), and dithionite-citrate.

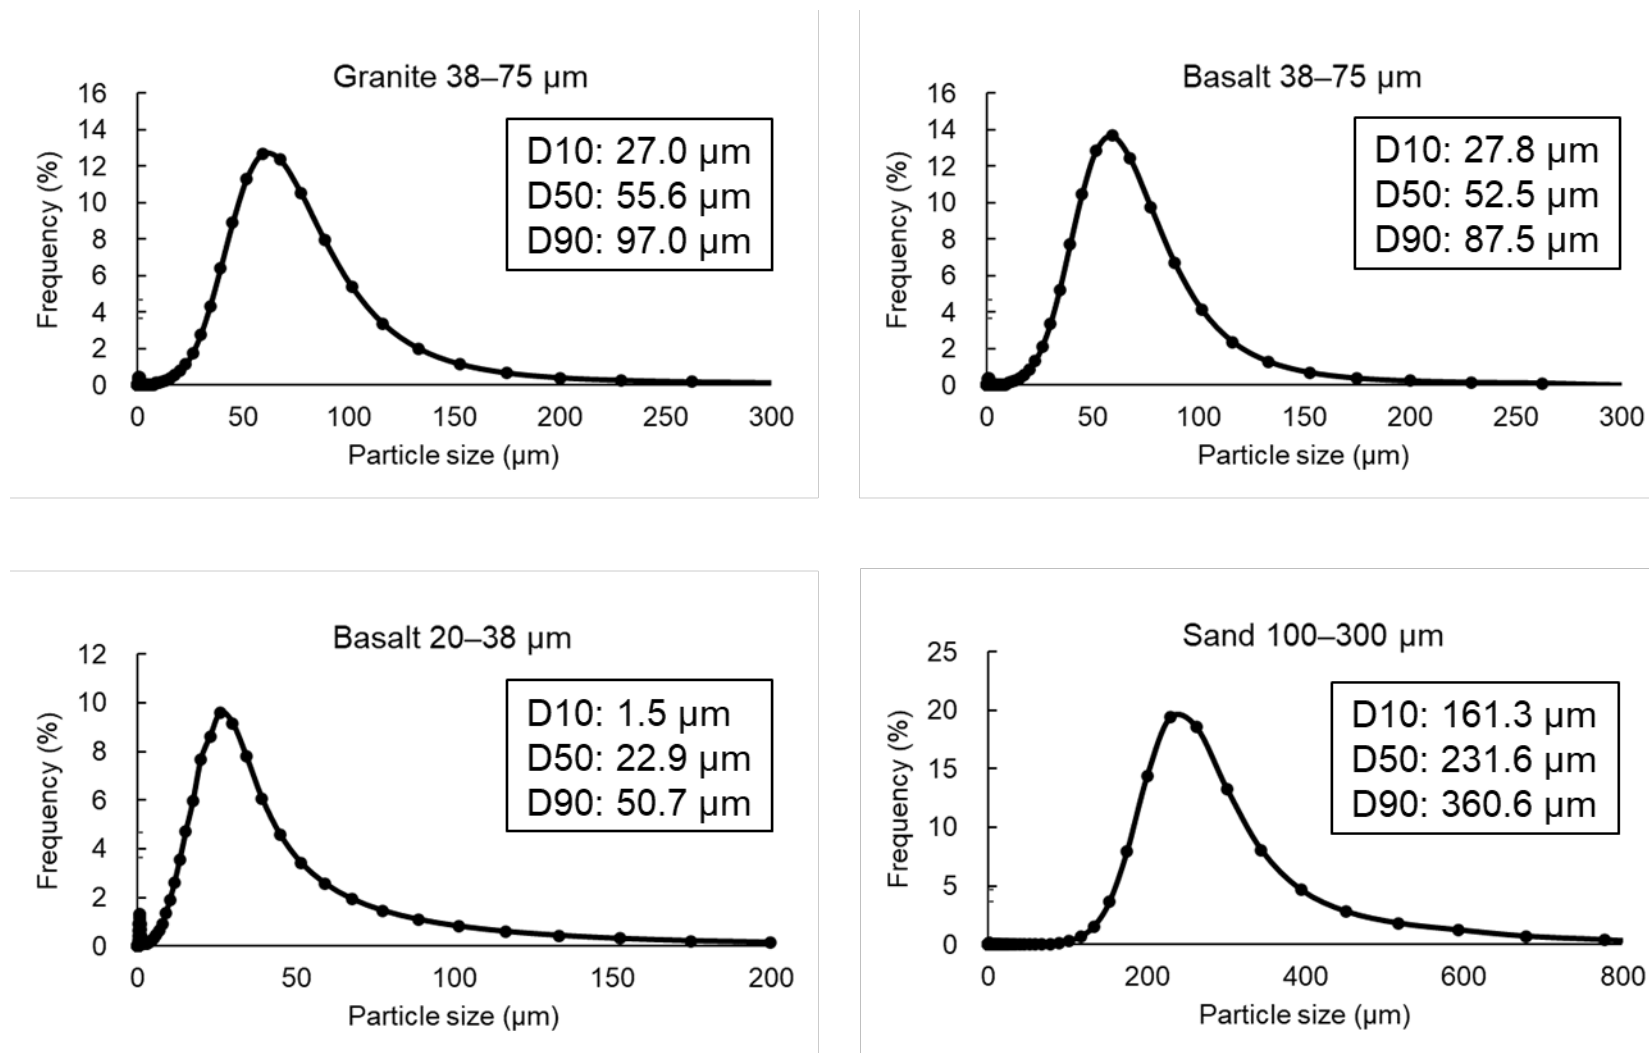

**Fig. S1** Particle size distribution of the crushed rocks (granite and basalt) and sand used in this experiment.

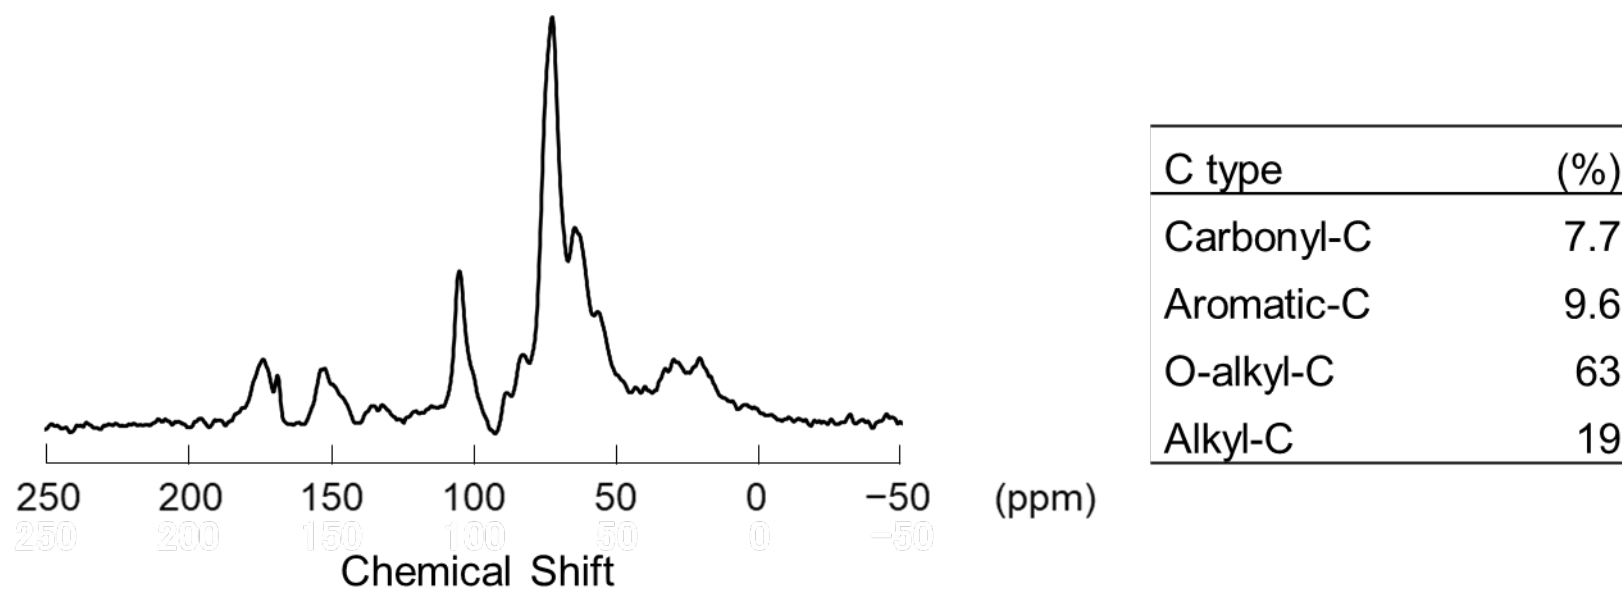

**Fig. S2** Solid-state MS  $^{13}\text{C}$  NMR spectrum and the proportion contributed by each C type to the total signal intensity in leaf compost used as a source of OM in this experiment.

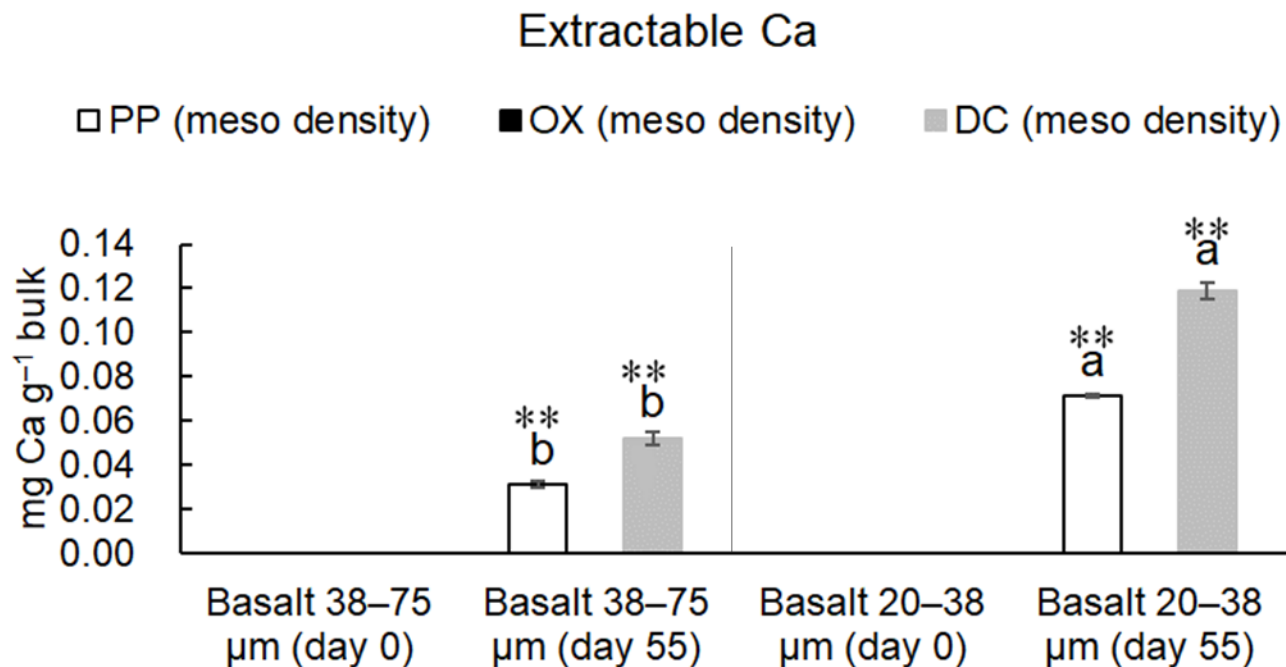

**Fig. S3** Amounts of extractable Ca in the MF from the mineral-OM mixtures on Day 0 and Day 55. The extractions were done sequentially with sodium pyrophosphate (PP), acid oxalate (OX) and dithionite-citrate (DC). The same letters in each extraction (i.e., PP, OX, or DC) on Day 55 are not significantly different at  $P < 0.05$  (Tukey's test;  $n = 3$ ). Differences between the “on Day 0” and “on Day 55” in both each mineral-OM mixture and each extraction (i.e., PP, OX, or DC) are significant at  $**P < 0.01$  ( $t$ -test).

Granite  
38–75  $\mu\text{m}$

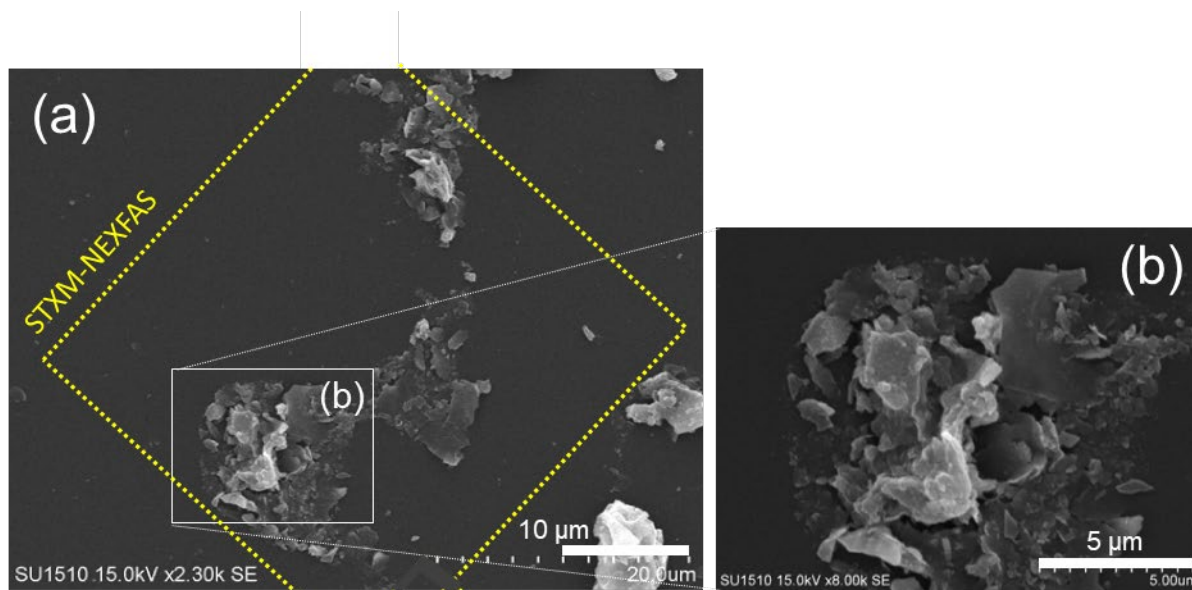

Basalt  
38–75  $\mu\text{m}$

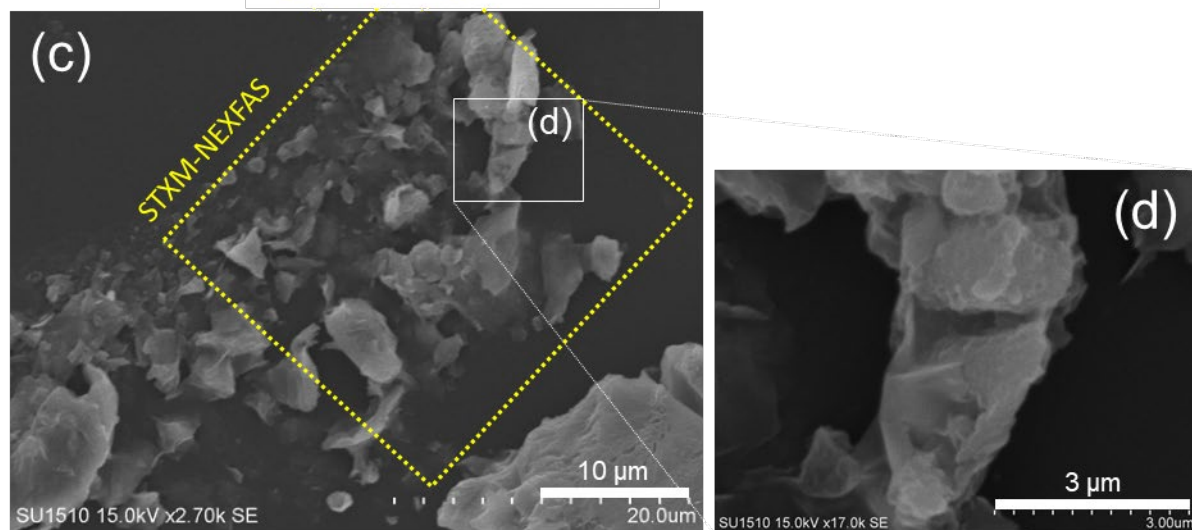

**Fig. S4** MF dispersed for STXM-NEXAFS. (a) and (b) granite treatment on Day 55, and (c) and (d) coarse basalt treatment on Day 55. Yellow dotted box in (a) and (c) represents the ROI used for STXM-NEXAFS analysis shown in Fig. 7 (A) and Fig. 7 (B), respectively. (b) and (d) corresponds to the higher resolution images used for STXM C optical density shown in Fig. 7 (a) and Fig. 7 (b), respectively.
